# Supplementary material for: Nigella sativa and Trigonella foenum-graecum Supplemented Chapatis Safely Improve HbA1c, Body Weight, Waist Circumference, Blood Lipids, and Fatty Liver in Overweight and Diabetic Subjects: A Twelve-Week Safety and Efficacy Study
Source: PubMed Central journal article supplement (PMC7478223; doi:10.1089/jmf.2020.0075), 2020-09-02
Supplement: Supp_Fig1.pdf [file Supp_Fig1.pdf]

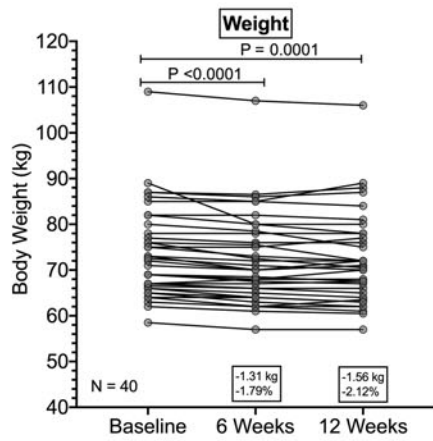

| Uncorrected Fisher's LSD | Mean Diff. | 95.00% CI of diff. | Significant? | Summary | Individual P Value |
|--------------------------|------------|--------------------|--------------|---------|--------------------|
| Baseline vs. 6 Weeks     | 1.313      | 0.8257 to 1.799    | Yes          | ****    | <0.0001            |
| Baseline vs. 12 Weeks    | 1.550      | 0.8081 to 2.292    | Yes          | ***     | 0.0001             |

|      | Baseline | 6 Weeks | 12 Weeks |
|------|----------|---------|----------|
| Mean | 73.21    | 71.90   | 71.66    |

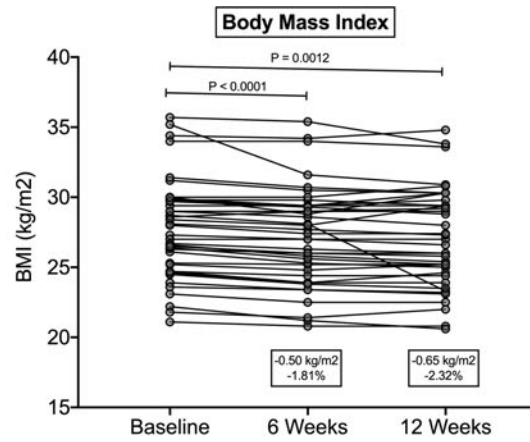

| Uncorrected Fisher's LSD | Mean Diff. | 95.00% CI of diff. | Significant? | Summary | Individual P Value |
|--------------------------|------------|--------------------|--------------|---------|--------------------|
| Baseline vs. 6 Weeks     | 0.4975     | 0.3071 to 0.6879   | Yes          | ****    | <0.0001            |
| Baseline vs. 12 Weeks    | 0.6450     | 0.2723 to 1.018    | Yes          | **      | 0.0012             |

|      | Baseline | 6 Weeks | 12 Weeks |
|------|----------|---------|----------|
| Mean | 27.70    | 27.20   | 27.05    |

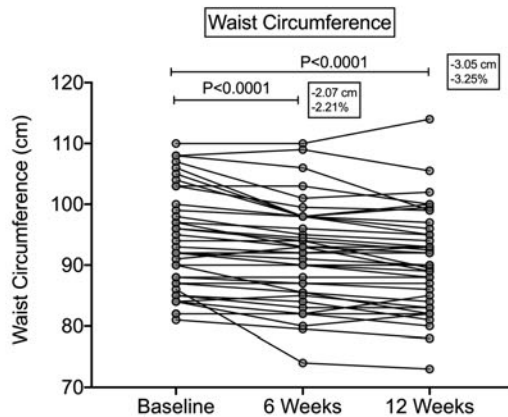

| Uncorrected Fisher's LSD | Mean Diff. | 95.00% CI of diff. | Significant? | Summary | Individual P Value |
|--------------------------|------------|--------------------|--------------|---------|--------------------|
| Baseline vs. 6 Weeks     | 2.063      | 1.195 to 2.930     | Yes          | ****    | <0.0001            |
| Baseline vs. 12 Weeks    | 3.050      | 2.103 to 3.997     | Yes          | ****    | <0.0001            |

|      | Baseline | 6 Weeks | 12 Weeks |
|------|----------|---------|----------|
| Mean | 105.0    | 103.5   | 103.1    |

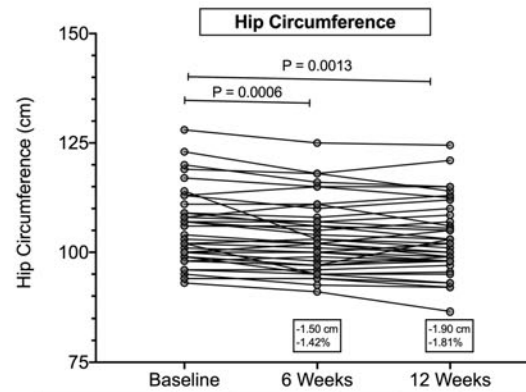

| Uncorrected Fisher's LSD | Mean Diff. | 95.00% CI of diff. | Significant? | Summary | Individual P Value |
|--------------------------|------------|--------------------|--------------|---------|--------------------|
| Baseline vs. 6 Weeks     | 1.463      | 0.6713 to 2.254    | Yes          | ***     | 0.0006             |
| Baseline vs. 12 Weeks    | 1.900      | 0.7908 to 3.009    | Yes          | **      | 0.0013             |

|      | Baseline | 6 Weeks | 12 Weeks |
|------|----------|---------|----------|
| Mean | 105.0    | 103.5   | 103.1    |

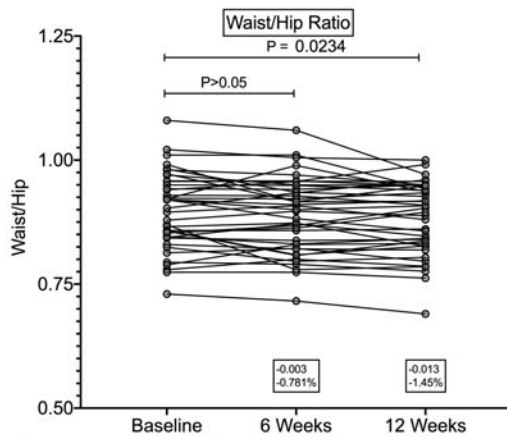

| Uncorrected Fisher's LSD | Mean Diff. | 95.00% CI of diff.   | Significant? | Summary | Individual P Value |
|--------------------------|------------|----------------------|--------------|---------|--------------------|
| Baseline vs. 6 Weeks     | 0.007575   | -0.002085 to 0.01724 | No           | ns      | 0.1208             |
| Baseline vs. 12 Weeks    | 0.01342    | 0.001919 to 0.02493  | Yes          | *       | 0.0234             |

|      | Baseline | 6 Weeks | 12 Weeks |
|------|----------|---------|----------|
| Mean | 0.896    | 0.889   | 0.883    |

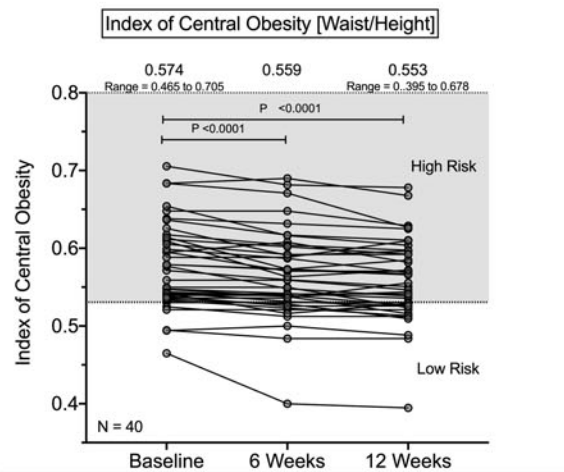

| Uncorrected Fisher's LSD | Mean Diff. | 95.00% CI of diff.  | Significant? | Summary | Individual P Value |
|--------------------------|------------|---------------------|--------------|---------|--------------------|
| Baseline vs. 6 Weeks     | 0.01246    | 0.007438 to 0.01748 | Yes          | ****    | <0.0001            |
| Baseline vs. 12 Weeks    | 0.01874    | 0.01319 to 0.02429  | Yes          | ****    | <0.0001            |

|      | Baseline | 6 Weeks | 12 Weeks |
|------|----------|---------|----------|
| Mean | 0.577    | 0.565   | 0.559    |

Shaded areas represent normal, reference range

SUPPLEMENTARY FIG. S1. Individual subject anthropometric values at baseline and completion of weeks 6 and 12.
