# Supplementary material for: Nigella sativa and Trigonella foenum-graecum Supplemented Chapatis Safely Improve HbA1c, Body Weight, Waist Circumference, Blood Lipids, and Fatty Liver in Overweight and Diabetic Subjects: A Twelve-Week Safety and Efficacy Study
Source: PubMed Central journal article supplement (PMC7478223; doi:10.1089/jmf.2020.0075), 2020-09-02
Supplement: Supp_Fig2.pdf [file Supp_Fig2.pdf]

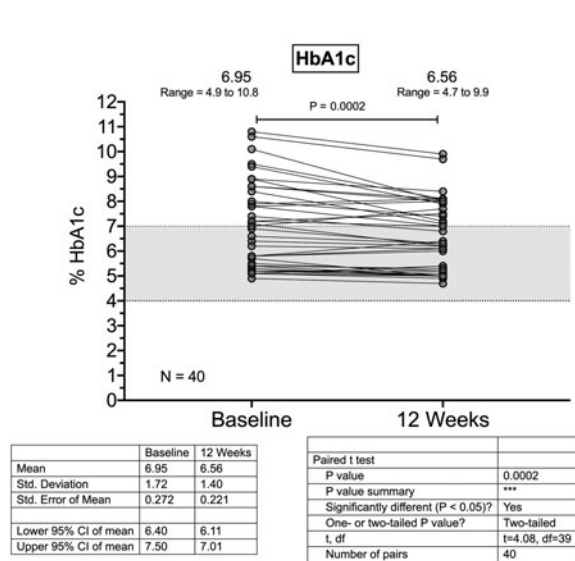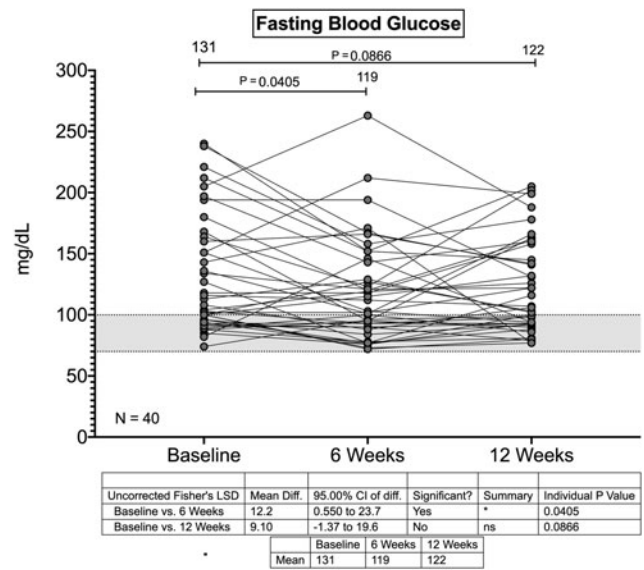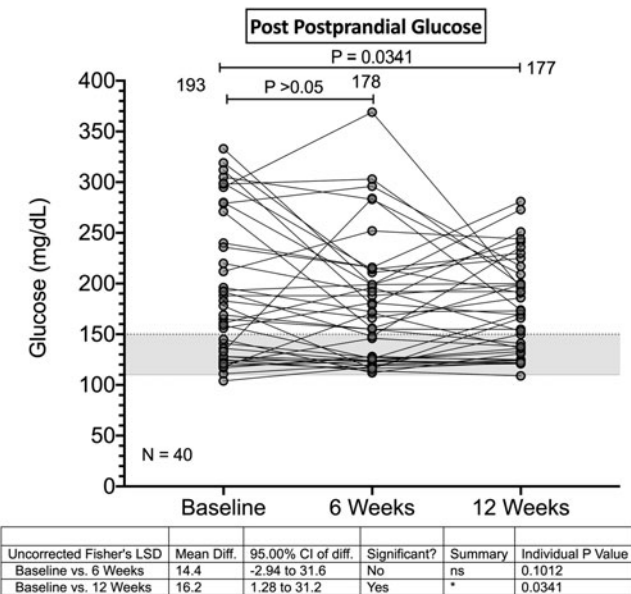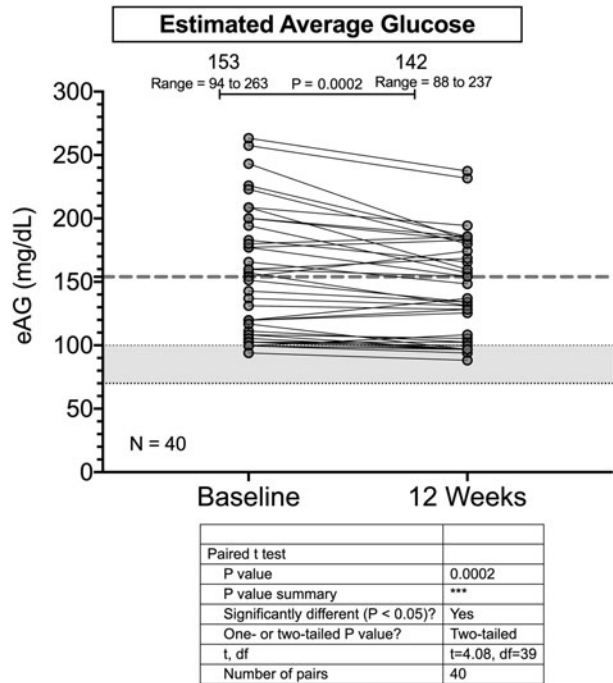

SUPPLEMENTARY FIG. S2. Individual subject glycemic values at baseline and completion of weeks 6 and 12.
