# Supplementary material for: Nigella sativa and Trigonella foenum-graecum Supplemented Chapatis Safely Improve HbA1c, Body Weight, Waist Circumference, Blood Lipids, and Fatty Liver in Overweight and Diabetic Subjects: A Twelve-Week Safety and Efficacy Study
Source: PubMed Central journal article supplement (PMC7478223; doi:10.1089/jmf.2020.0075), 2020-09-02
Supplement: Supp_Fig3.pdf [file Supp_Fig3.pdf]

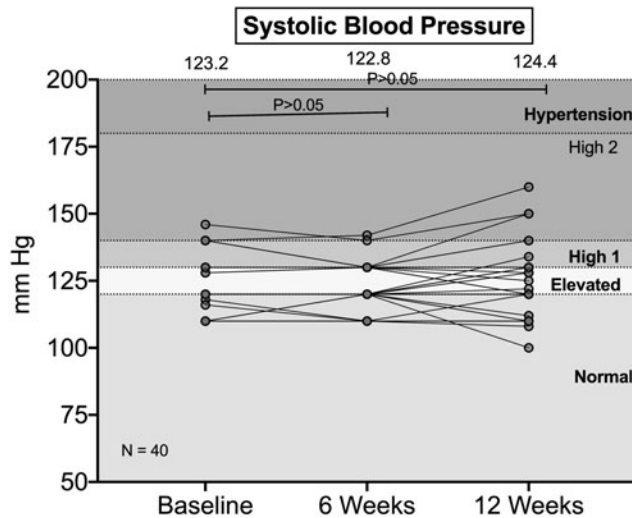

| Uncorrected Fisher's LSD | Mean Diff. | 95.00% CI of diff. | Significant? |
|--------------------------|------------|--------------------|--------------|
| Baseline vs. 6 Weeks     | 0.350      | -1.05 to 1.75      | No           |
| Baseline vs. 12 Weeks    | -1.22      | -4.08 to 1.63      | No           |

| Repeated measures ANOVA summary       |        |
|---------------------------------------|--------|
| Assume sphericity?                    | No     |
| F                                     | 0.941  |
| P value                               | 0.3654 |
| P value summary                       | ns     |
| Statistically significant (P < 0.05)? | No     |
| Geisser-Greenhouse's epsilon          | 0.688  |
| R squared                             | 0.0236 |

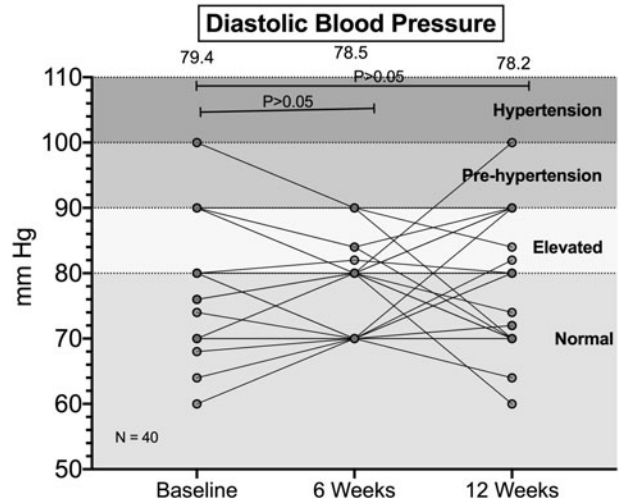

| Uncorrected Fisher's LSD | Mean Diff. | 95.00% CI of diff. | Significant? |
|--------------------------|------------|--------------------|--------------|
| Baseline vs. 6 Weeks     | 0.850      | -0.887 to 2.59     | No           |
| Baseline vs. 12 Weeks    | 1.15       | -2.37 to 4.67      | No           |

| Repeated measures ANOVA summary       |          |
|---------------------------------------|----------|
| Assume sphericity?                    | No       |
| F                                     | 0.3477   |
| P value                               | 0.6286   |
| P value summary                       | ns       |
| Statistically significant (P < 0.05)? | No       |
| Geisser-Greenhouse's epsilon          | 0.6923   |
| R squared                             | 0.008837 |

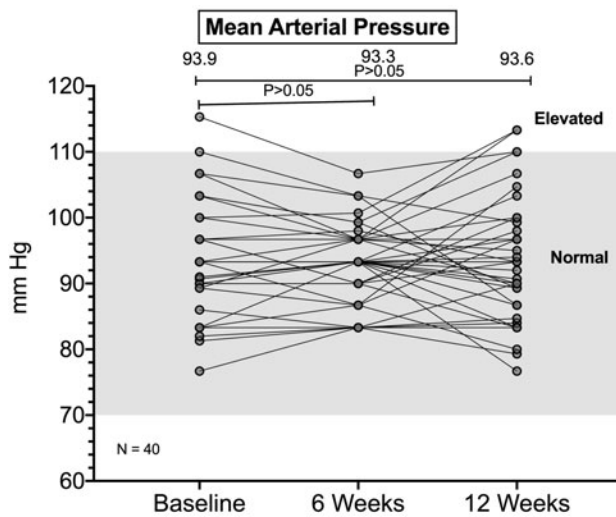

| Uncorrected Fisher's LSD | Mean Diff. | 95.00% CI of diff. | Significant? |
|--------------------------|------------|--------------------|--------------|
| Baseline vs. 6 Weeks     | 0.850      | -0.887 to 2.59     | No           |
| Baseline vs. 12 Weeks    | 1.15       | -2.37 to 4.67      | No           |

|                      | Baseline | 6 Weeks | 12 Weeks |
|----------------------|----------|---------|----------|
| Mean                 | 93.9     | 93.3    | 93.6     |
| Std. Deviation       | 8.05     | 5.74    | 9.18     |
| Std. Error of Mean   | 1.27     | 0.907   | 1.45     |
| Lower 95% CI of mean | 91.4     | 91.4    | 90.7     |
| Upper 95% CI of mean | 96.5     | 95.1    | 96.5     |

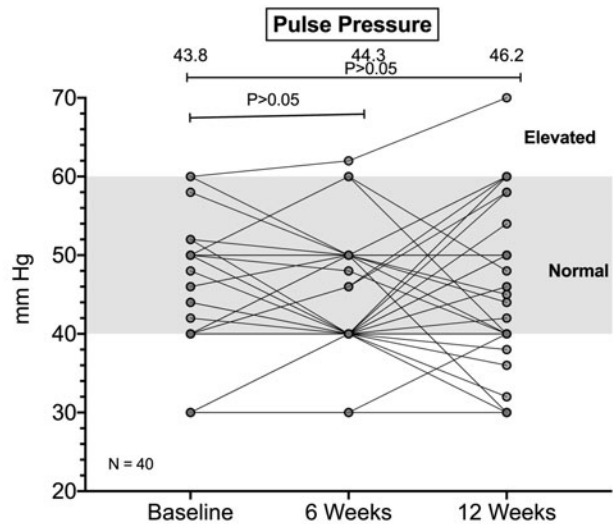

| Uncorrected Fisher's LSD | Mean Diff. | 95.00% CI of diff. | Significant? |
|--------------------------|------------|--------------------|--------------|
| Baseline vs. 6 Weeks     | -0.5000    | -3.569 to 2.569    | No           |
| Baseline vs. 12 Weeks    | -2.375     | -5.444 to 0.6940   | No           |

| Repeated measures ANOVA summary       |        |
|---------------------------------------|--------|
| Assume sphericity?                    | Yes    |
| F                                     | 1.319  |
| P value                               | 0.2732 |
| P value summary                       | ns     |
| Statistically significant (P < 0.05)? | No     |

SUPPLEMENTARY FIG. S3. Individual subject blood pressure values at baseline and completion of weeks 6 and 12.
