# Supplementary material for: Nigella sativa and Trigonella foenum-graecum Supplemented Chapatis Safely Improve HbA1c, Body Weight, Waist Circumference, Blood Lipids, and Fatty Liver in Overweight and Diabetic Subjects: A Twelve-Week Safety and Efficacy Study
Source: PubMed Central journal article supplement (PMC7478223; doi:10.1089/jmf.2020.0075), 2020-09-02
Supplement: Supp_Fig7.pdf [file Supp_Fig7.pdf]

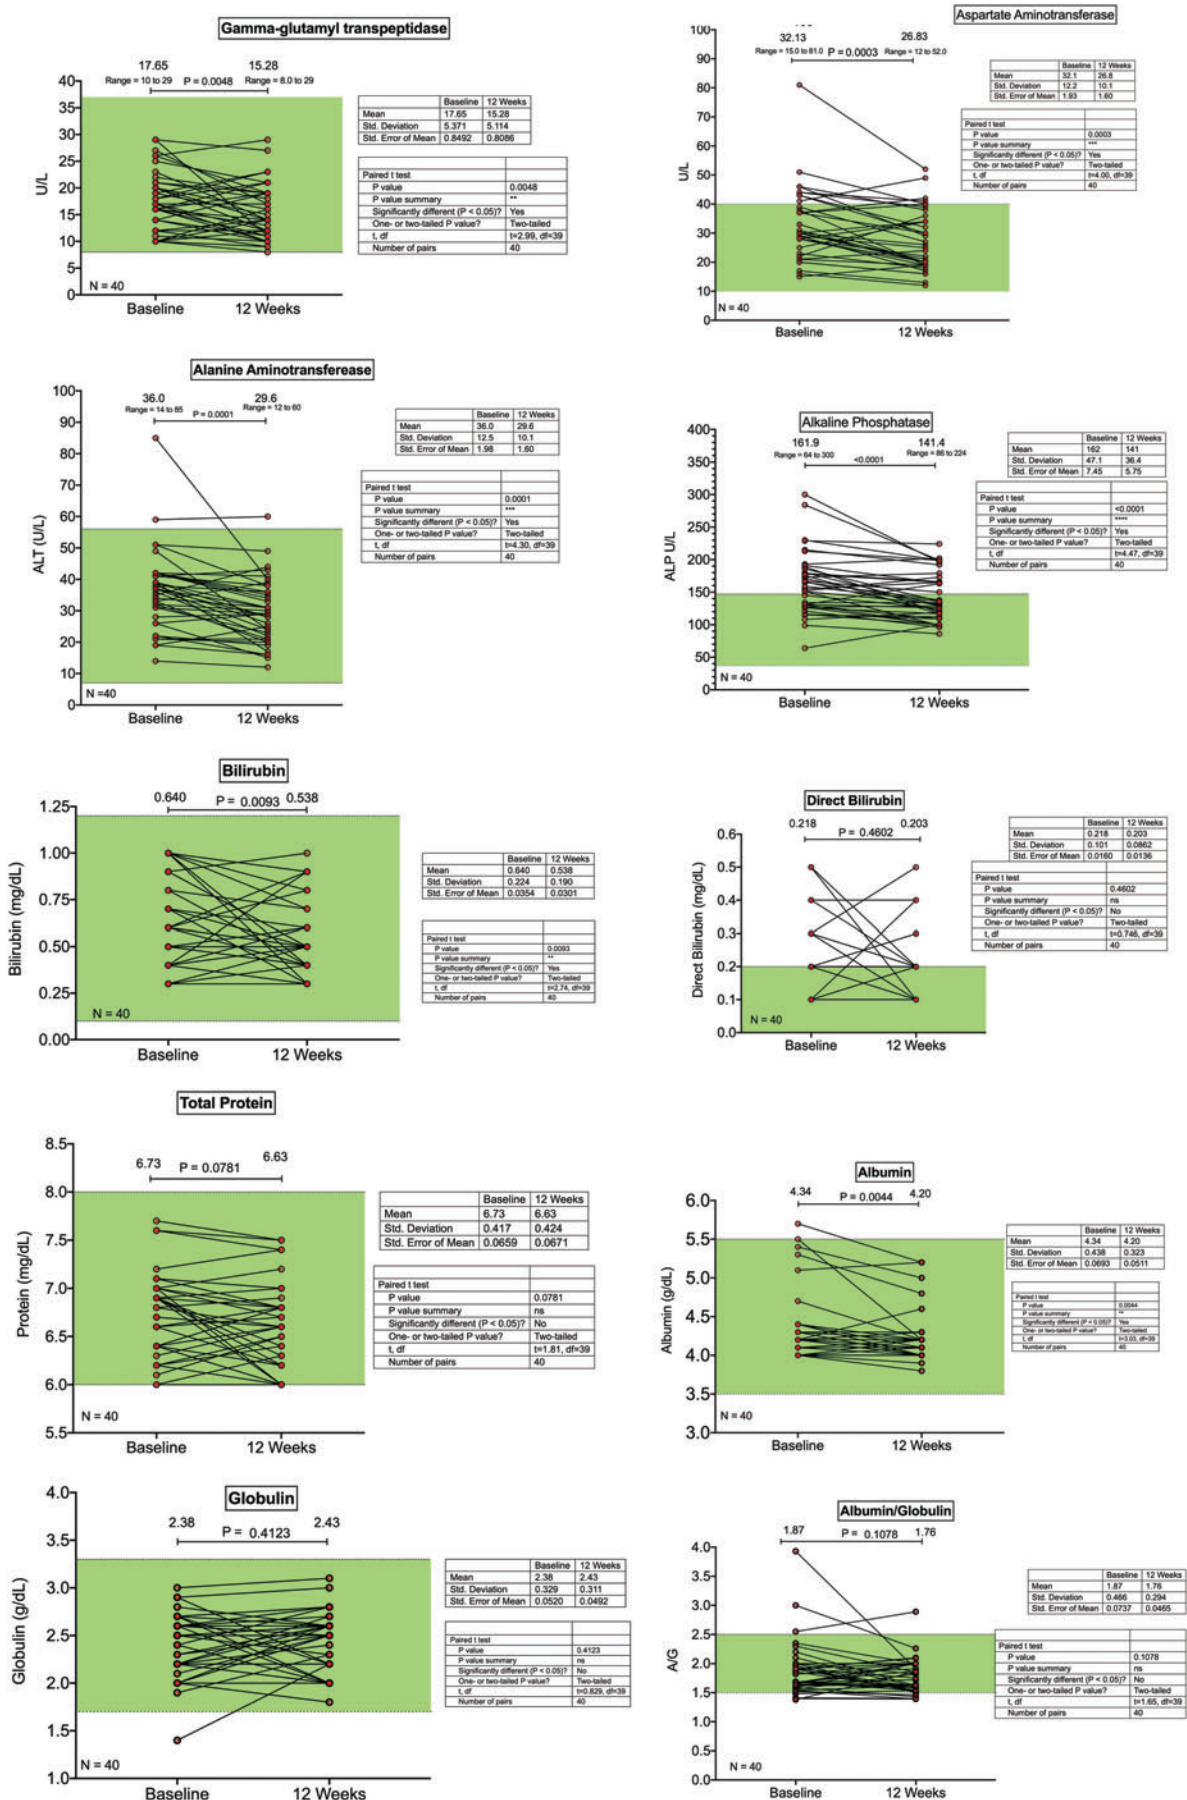

SUPPLEMENTARY FIG. S7. Individual subject kidney and thyroid profiles at baseline and completion of week 12.
